# Supplementary material for: One-step synthesis of wire-in-plate nanostructured materials made of CoFe-LDH nanoplates coupled with Co(OH)2 nanowires grown on a Ni foam for a high-efficiency oxygen evolution reaction
Source: Royal Society of Chemistry journal article supplement (doi:10.1039/c9cc00268e), 2019-01-01
Supplement: c9cc00268e1.pdf [file c9cc00268e1.pdf]

## **Supplemental Information**

### **One-step synthesis of wire-in-plate nanostructured materials made of CoFe - LDH nanoplates coupled with Co(OH)<sub>2</sub> nanowires grown on Ni foam for high-efficiency oxygen evolution reaction**

#### **Experimental**

##### **Materials**

Cobalt nitrate hexahydrate (Sinopharm Chemical Reagent Co., Ltd.), Iron(II)sulfate heptahydrate (Sinopharm Chemical Reagent Co., Ltd.), ammonium fluoride (Sinopharm Chemical Reagent Co., Ltd.), urea (Aladdin), ethanol (Sinopharm Chemical Reagent Co., Ltd.), Ruthenium (IV) oxide (Adamas-beta) and Nafion dispersion (5 wt%, Alfa Aesar) were used in this work as received without further purification from commercial sources.

##### **Synthesis of CoFe LDH with different molar ratios of Co and Fe on Ni foam substrate (Co<sub>x</sub>Fe<sub>y</sub>-LDH/NF)**

The Co<sub>x</sub>Fe<sub>y</sub>/NF nanoarrays with x/y=4/0, 4/1, 4/2, 4/3 and 4/4 on Ni foam were synthesized by a facile hydrothermal reaction (x and y present the amount of added Co<sup>2+</sup> and Fe<sup>2+</sup>, respectively). Prior to the synthesis, a piece of Ni foam (3.5×6.5cm) was placed into the solution of HCl and deionized water (Volume ratio 1:3) with ultrasonic treatment for 30 min to remove surface oil stains and oxide layer, following by washing the NF till pH=7. In a typical procedure (Co<sub>4</sub>Fe<sub>2</sub>-LDH/NF), Co(NO<sub>3</sub>)<sub>2</sub> • 6H<sub>2</sub>O(1.1640

g, 4mmol),  $\text{FeSO}_4 \cdot 7\text{H}_2\text{O}$  (0.5560 g, 2mmol), urea (0.7205 g, 12mmol),  $\text{NH}_4\text{F}$  (0.3704 g, 10mmol) were dissolved in 80 mL deionized water with vigorous stirring until the solution is clear and transparent (about 20 min). The resulting solution was transferred into a 100 mL Teflon-lined stainless-steel autoclave with a piece of clean nickel foam immersed into the reaction solution almost vertically. The autoclave was sealed and heated at 120 °C for 12 h, and then allowed to cool to room temperature. The obtained material was washed three times with deionized water in ultrasound (10s each), and then dried in a vacuum oven at 60 °C for 12 h. LDHs with the other Co:Fe ratios were synthesized using the same procedure with different added amount of Co and Fe.

For comparison, a benchmark  $\text{RuO}_2$  catalyst on Ni foam was fabricated by the following steps: 280  $\mu\text{L}$  ethanol, 20  $\mu\text{L}$  naphthol, 70  $\mu\text{L}$  deionized water and 50 mg  $\text{RuO}_2$  were mixed to prepare dispersion, then add the prepared dispersion to the NF (the mass added to the electrode is determined according to the loading mass).

### **Material characterizations**

The morphologies, energy dispersion spectra (EDS) and elemental mapping of the samples were collected by a scanning electron microscope (FE-SEM, JSM-7500, Japan), transmission electron microscope (FE-TEM, G2F20, USA) and scanning transmission electron microscopy (STEM, Tecnai G2F30). The phase structures of the materials were performed by X-ray powder diffraction (XRD, Smart Lab, Rigaku with  $\text{Cu K}\alpha$  radiation) and XPS datas were collected on an X-ray photoelectron spectroscopy (XPS, PHI 5000).

### **Electrochemical measurements**

Electrochemical measurements were performed with a workstation (CHI660E, Shanghai, China) in a typical three-electrode configuration consisting of a carbon rod (the counter electrode), a saturated Hg/HgO (the reference electrode) and the active material (the working electrode) in 1 M KOH solution. The linear sweep voltammetry (LSV) polarization curves were collected at a scan rate of  $2\text{ mV s}^{-1}$ . The measured potentials vs. Hg/HgO were converted to the reversible hydrogen electrode (RHE) scale experimentally. The measured potentials vs. Hg/HgO were converted to the reversible hydrogen electrode (RHE) scale experimentally. The Hg/HgO reference electrode was calibrated according to the method published by Y. Liang and co-workers.<sup>1</sup> All the potential values measured were calibrated by using the following equation:  $E(\text{RHE}) = E(\text{Hg/HgO}) + 0.919\text{ V}$ . The calibration was conducted in the high purity hydrogen saturated electrolyte with a Pt wire as the working electrode. CVs were run at a scan rate of  $1\text{ mV s}^{-1}$ . The overpotential ( $\eta$ ) was calculated by  $\eta (\text{V}) = E(\text{RHE}) - 1.23\text{ V}$ . Tafel slope was obtained with corresponding LSV according to the equation:  $\eta = b \cdot \log J + a$  ( $\eta$  is the overpotential;  $b$  is the Tafel slope;  $J$  is the current density; and  $a$  is the overpotential at current density of  $1\text{ mA cm}^{-2}$ ).

### Scheme:

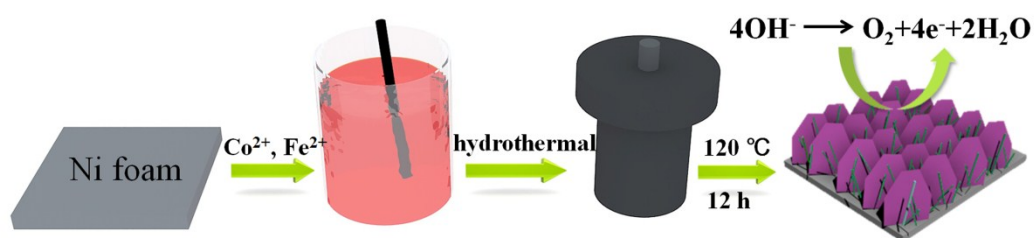

**Scheme S1.** Schematic representation of the fabrication procedure for  $\text{Co}_4\text{Fe}_2\text{-LDHs/Co(OH)}_2\text{-NWs}$  with wire-in-plate structure via a simple one-step hydrothermal method

**Figures:**

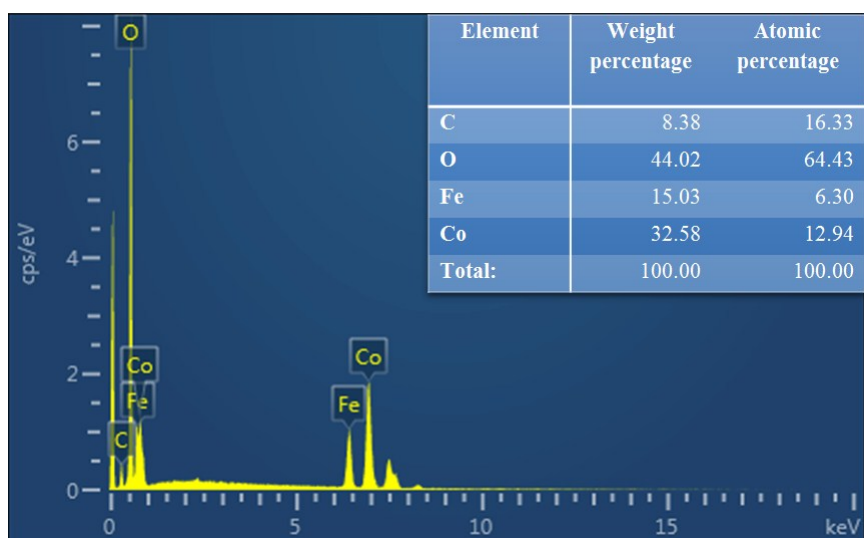

**Fig. S1** Typical energy-dispersive X-ray spectroscopy (EDS) for  $\text{Co}_4\text{Fe}_2\text{-LDHs/Co(OH)}_2\text{-NWs}$

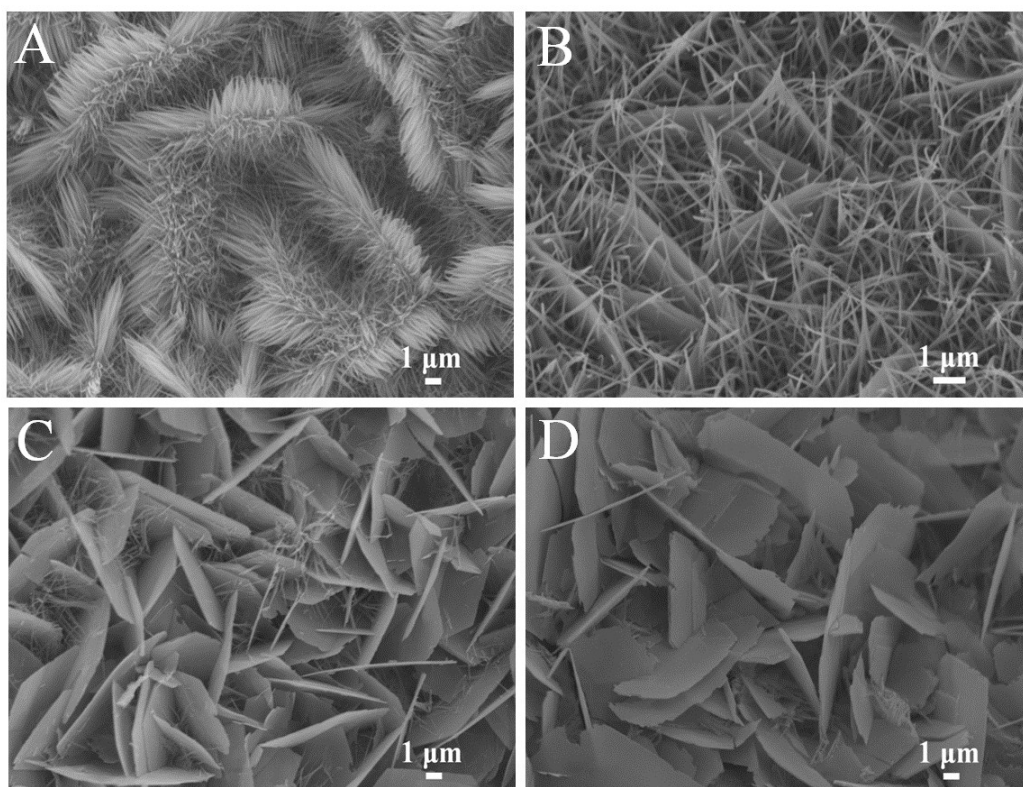

**Fig. S2** (A) SEM image of  $\text{Co(OH)}_2/\text{NF}$ ; (B-D) SEM images of  $\text{Co}_4\text{Fe}_1\text{-LDHs/Co(OH)}_2\text{-NWs}$ ,  $\text{Co}_4\text{Fe}_3\text{-LDHs/Co(OH)}_2\text{-NWs}$  and  $\text{Co}_4\text{Fe}_4\text{-LDHs/Co(OH)}_2\text{-NWs}$ , respectively.

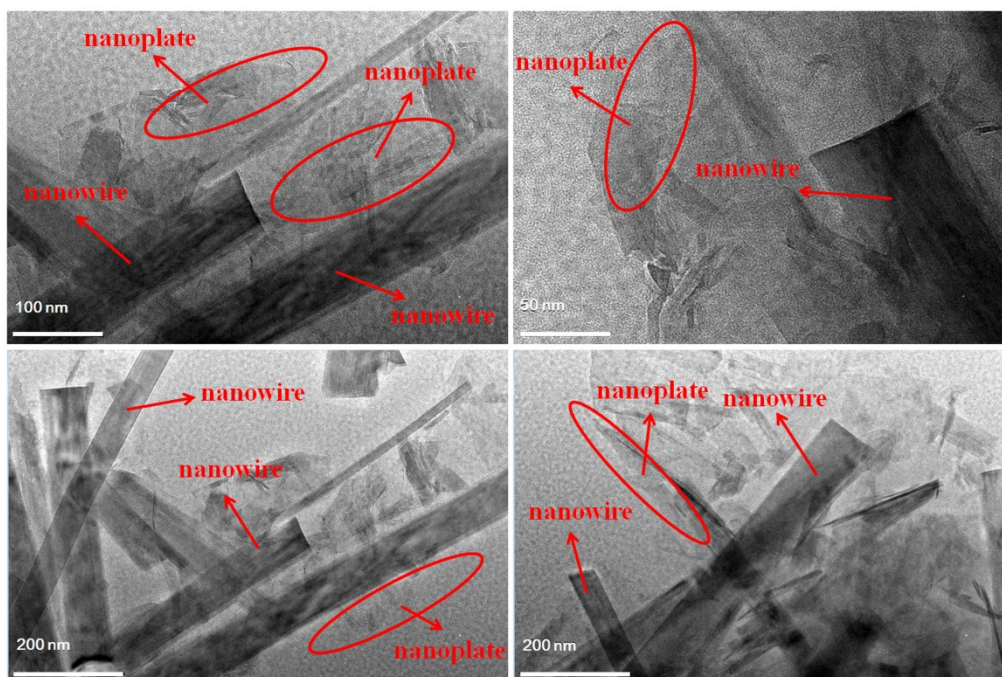

**Fig. S3** TEM images of different scales of  $\text{Co}_4\text{Fe}_2\text{-LDHs/Co(OH)}_2\text{-NWs}$

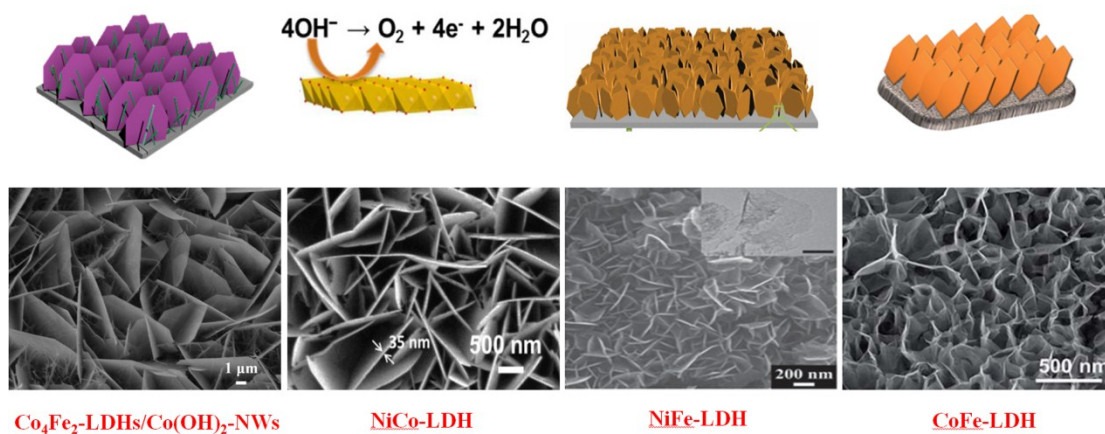

**Fig. S4** comparison of traditional  $\text{NiCo-LDH}^2$ ,  $\text{NiFe-LDH}^3$ ,  $\text{CoFe-LDH}^4$  and the as-fabricated  $\text{Co}_4\text{Fe}_2\text{-LDHs/Co(OH)}_2\text{-NWs}$  from the schematic diagrams and SEM images

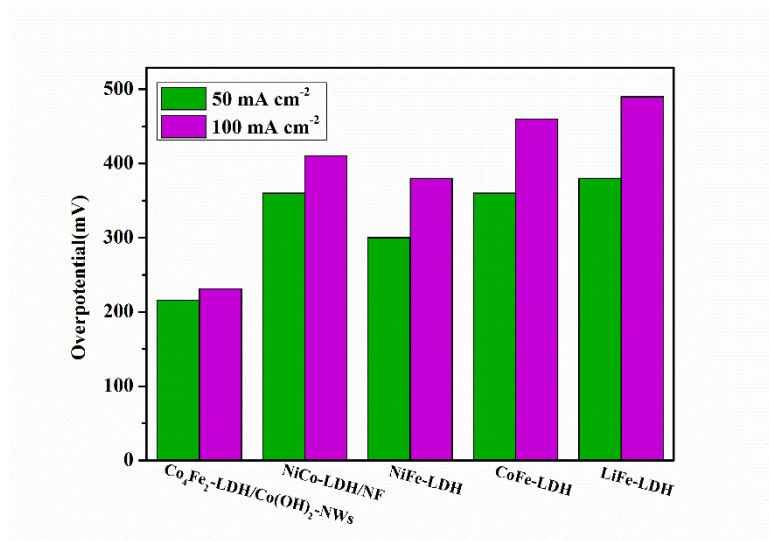

**Fig. S5** comparison of traditional NiFe-LDH<sup>4</sup>, CoFe-LDH<sup>4</sup>, LiFe-LDH<sup>4</sup>, NiCo-LDH/NF<sup>5</sup> and the as-fabricated Co<sub>4</sub>Fe<sub>2</sub>-LDHs/Co(OH)<sub>2</sub>-NWs of overpotentials (at 50 and 100 mA cm<sup>-2</sup>)

**Table S1.** Comparison of the catalytic OER performance between our Co<sub>4</sub>Fe<sub>2</sub>-LDHs/Co(OH)<sub>2</sub>-NWs and other various reported earth-abundant electrocatalysts in 1 M KOH.

| Catalyst                                                       | Support                 | $\eta@10 \text{ mA cm}^{-2}$ | $\eta@100 \text{ mA cm}^{-2}$ | Stability                             | Ref.      |
|----------------------------------------------------------------|-------------------------|------------------------------|-------------------------------|---------------------------------------|-----------|
| Co <sub>4</sub> Fe <sub>2</sub> -LDHs/Co(OH) <sub>2</sub> -NWs | Ni foam                 | -                            | 225                           | 40h at 1.849 V(vs. RHE)               | This work |
| 5.0%Ce-NiFe-LDH/CNT                                            | CNT                     | ~227                         | -                             | 30000s at 10 mA cm <sup>-2</sup>      | S6        |
| Cu(OH) <sub>2</sub> @CCHH NW/CF                                | macroporous copper foam | 120*                         | 290                           | 20h at $\eta=260 \text{ mV}$          | S7        |
| Ni <sub>0.67</sub> Fe <sub>0.33</sub> /C                       | -                       | 210                          | 260                           | 28h at 40 mA cm <sup>-2</sup>         | S8        |
| NiFe-LDH/Cu                                                    | Cu foam                 | 199                          | 281                           | 48h at 10 and 100 mA cm <sup>-2</sup> | S9        |
| CuNi(OH) <sub>x</sub>                                          | Cu foil                 | 280                          | 323*                          | 24h at 1.55 V(vs. RHE)                | S10       |
| NiCo-UMOFNs                                                    | Cu foam                 | 189                          | -                             | 200h at $\eta=250 \text{ mV}$         | S11       |
| NiCo-NiCoO <sub>2</sub> @NC                                    | -                       | 318                          | 400*                          | 12h at $\eta=320 \text{ mV}$          | S12       |
| Ni <sub>0.7</sub> Fe <sub>0.3</sub> S <sub>2</sub>             | Ni foam                 | 198                          | 287                           | 50000s at 10 mA cm <sup>-2</sup>      | S13       |
| MnO <sub>2</sub> /NiCo <sub>2</sub> O <sub>4</sub> /NF         | Ni foam                 | 340                          | 425*                          | -                                     | S14       |
| MoP/Ni <sub>2</sub> P/NF                                       | Ni foam                 | -                            | 380                           | 12h at $\eta=330 \text{ mV}$          | S15       |
| MnCo <sub>2</sub> S <sub>4</sub>                               | Ti mesh                 | -                            | 350*                          | 100h at 20 and 50 mA cm <sup>-2</sup> | S16       |

|                                           |         |     |      |                               |     |
|-------------------------------------------|---------|-----|------|-------------------------------|-----|
| Water-plasma-enabled exfoliated CoFe LDHs | -       | 232 | -    | 40000s at 1.47 V(vs. RHE)     | S17 |
| Co-B@CoO/Ti                               | Ti mesh | 286 | 310* | 20h at 50 mA cm <sup>-2</sup> | S18 |

\* The value is calculated from the curves shown in the literature.

**Table S2.** Comparison of the catalytic OER performance between our Co<sub>4</sub>Fe<sub>2</sub>-LDHs/Co(OH)<sub>2</sub>-NWs and other traditional LDH-based electrocatalysts in 1 M KOH.

| Catalyst                                                       | Support | $\eta@50$<br>mA cm <sup>-2</sup> | $\eta@100$<br>mA cm <sup>-2</sup> | Stability                               | Ref.      |
|----------------------------------------------------------------|---------|----------------------------------|-----------------------------------|-----------------------------------------|-----------|
| Co <sub>4</sub> Fe <sub>2</sub> -LDHs/Co(OH) <sub>2</sub> -NWs | Ni foam | 216                              | 231                               | 40h at 1.849 V(vs. RHE)                 | This work |
| NiCo-LDH/NF                                                    | Ni foam | ~360                             | ~410                              | 20h at 40 mA cm <sup>-2</sup>           | S5        |
| NiFe-LDH                                                       | Ni foam | ~300                             | 380                               | 10h at 10 mA cm <sup>-2</sup>           | S4        |
| CoFe-LDH                                                       | Ni foam | ~360                             | 460                               | 10h at 10 mA cm <sup>-2</sup>           | S4        |
| LiFe-LDH                                                       | Ni foam | ~380                             | 490                               | 10h at 10 mA cm <sup>-2</sup>           | S4        |
| Ni <sub>0.67</sub> Fe <sub>0.33</sub> /C                       | -       | ~245                             | 260                               | 28h at 40 mA cm <sup>-2</sup>           | S8        |
| NiFe-LDH/Cu                                                    | Cu foam | ~250                             | 281                               | 48h at 10 and 100 mA cm <sup>-2</sup>   | S9        |
| FeNi-rGO LDH                                                   | Ni foam | ~228                             | -                                 | 80h at 5, 10 and 20 mA cm <sup>-2</sup> | S19       |
| water-plasma exfoliated CoFe LDH nanosheets                    | Ni foam | ~250                             | ~265                              | 40000s at 1.47 V(vs. RHE)               | S17       |

## References

- S1 Y. Liang, *Nat. Mater.*, 2011, **10**, 780–786
- S2 J. Jiang, A. Zhang, L. Li and L. Ai, *J. Power Sources*, 2015, 278, 445–451.
- S3 Z. Lu, W. Xu, W. Zhu, Q. Yang, X. Lei, J. Liu, Y. Li, X. Sun and X. Duan, *Chem. Commun.*, 2014, 50, 6479–6482.
- S4 Z. Li, M. Shao, H. An, Z. Wang, S. Xu, M. Wei, D. G. Evans and X. Duan, *Chem. Sci.*, 2015, 6, 6624–6631.
- S5 W. Liu, J. Bao, M. Guan, Y. Zhao, J. Lian, J. Qiu, L. Xu, Y. Huang, J. Qian and H. Lia, *Dalton Trans.*, 2017, 46, 8372–8376.
- S6 H. Xu, B. Wang, C. Shan, P. Xi, W. Liu and Y. Tang, *ACS Appl. Mater. Interfaces*, 2018, **10**, 6336–6345.
- S7 L. Xie, C. Tang, K. Wang, G. Du, A. M. Asiri and X. Sun, *Small*, 2017, **13**, 1–6.
- S8 S. Yin, W. Tu, Y. Sheng, Y. Du, M. Kraft, A. Borgna and R. Xu, *Adv. Mater.*, 2018, **30**, 1–9.
- S9 L. Yu, H. Zhou, J. Sun, F. Qin, F. Yu, J. Bao, Y. Yu, S. Chen and Z. Ren, *Energy Environ. Sci.*, 2017, **10**, 1820–1827.
- S10 S. Li, Y. Wang, S. Peng, L. Zhang, A. M. Al-Enizi, H. Zhang, X. Sun and G. Zheng, *Adv. Energy Mater.*, 2016, **6**, 1–7.
- S11 S. Zhao, Y. Wang, J. Dong, C. T. He, H. Yin, P. An, K. Zhao, X. Zhang, C. Gao, L. Zhang, J. Lv, J. Wang, J. Zhang, A. M. Khattak, N. A. Khan, Z. Wei, J. Zhang, S. Liu, H. Zhao and Z. Tang, *Nat. Energy*, 2016, **1**, 1–10.
- S12 Y. Xiao, P. Zhang, X. Zhang, X. Dai, Y. Ma, Y. Wang, Y. Jiang, M. Liu and Y. Wang, *J. Mater. Chem. A*, 2017, **5**, 15901–15912.
- S13 J. Yu, G. Cheng and W. Luo, *J. Mater. Chem. A*, 2017, **5**, 15838–15844.
- S14 K. L. Yan, X. Shang, W. K. Gao, B. Dong, X. Li, J. Q. Chi, Y. R. Liu, Y. M. Chai and C. G. Liu, *J. Alloys Compd.*, 2017, **719**, 314–321.
- S15 C. Du, M. Shang, J. Mao and W. Song, *J. Mater. Chem. A*, 2017, **5**, 15940–15949.
- S16 X. Zhang, C. Si, X. Guo, R. Kong and F. Qu, *J. Mater. Chem. A*, 2017, **5**, 17211–17215.

- S17 R. Liu, Y. Wang, D. Liu, Y. Zou and S. Wang, *Adv. Mater.*, 2017, **29**, 1–7.
- S18 W. Lu, T. Liu, L. Xie, C. Tang, D. Liu, S. Hao, F. Qu, G. Du, Y. Ma, A. M. Asiri and X. Sun, *Small*, 2017, **13**, 1–8.
- S19 X. Long, J. Li, S. Xiao, K. Yan, Z. Wang, H. Chen and S. Yang, *Angew. Chemie - Int. Ed.*, 2014, **53**, 7584–7588.
